# Supplementary material
Source: PubMed Central journal article supplement (PMC3405627)
Supplement: supp_50.7.2217_JCM-JCM01032-12-s01.pdf [file supp_50.7.2217_JCM-JCM01032-12-s01.pdf]

## **SUPPLEMENTAL MATERIALS AND METHODS**

### **FABRICATION OF ITEMS SURFACED WITH ANTIMICROBIAL COPPER ALLOYS:**

Copper alloys were selected to cover an object was based on its ability to be fabricated and/or surfaced into a particular component; its strength and durability; its ability to withstand the rigors placed on materials by standard hospital cleaners and the ability of the surface finish to provide consistent wear and aesthetics over the trial. Because of the small quantities involved in the study, items selected were custom built with prototype tooling and designs. However, all of the alloys are commercially available in sheet, rod, castings, and tube form. Consequently, on a production-quantity basis, these same items that were custom fabricated for this study, could be easily and economically manufactured through high-volume stamping, casting, and other common manufacturing techniques.

**SELECTION OF ROOMS TO PLACE COPPER OBJECTS:** In order to minimize bias and potential Hawthorne effects, a cluster of rooms (6 rooms at Hospitals 1&2 and 4 rooms at Hospital 3) within each MICU were selected. Six copper objects were placed in rooms that were immediately adjacent to control rooms within the cluster.

**WIPE SAMPLE COLLECTION PROCEDURE:** A sterile 2" x 1" 50%, rayon/50%, cotton wipe (Kimberly Clarke, KimTech Critical Task Wipers<sup>®</sup>) pre-moistened with 200 µl of sterile phosphate buffered saline ((PBS-LT) (137 mM NaCl; 3µM KCl; 10mM Na<sub>2</sub>HPO<sub>4</sub>; 1 mM KH<sub>2</sub>PO<sub>4</sub> (pH 7.0)) supplemented with 0.5% tween 80 and 0.07% lecithin was aseptically placed into a sterile 50 ml screw-top conical tube. At the time of sampling a sterile glove was donned. The wipe was aseptically removed. After sample collection, the wipe was placed back into the sterile tube from which it came. Samples were stored immediately after collection on a frozen refrigerant pack until processing. For the majority of the surfaces sampled, either a 10 cm x 10 cm or 4 cm x 25 cm sterile template was placed over the

appropriately shaped surface. The exposed area was vigorously wiped using uniform pressure and motion, five strokes horizontally and vertically for a total of ten total strokes in each direction. Samples from MSKCC and RHJVA were transported to MUSC and processed. Technical staff responsible for sampling were trained and calibrated by a common technician to insure the fidelity of the process.

**SHIPPING:** Samples were shipped for processing from MSKCC to MUSC via overnight carrier (FedEx). The temperature of the samples was maintained at 4°C using frozen, reusable, foam refrigerant packs (PolarPack (ThermoSafe Brands)) according to the manufacturer's specifications. The temperature of the samples was continuously monitored using a Dickson SP425 data logger ([www.DicksonData.com](http://www.DicksonData.com)). Samples exceeding 20°C, for greater than 3 hours during the shipping process, were deemed spoiled and discarded.

**SAMPLE PROCESSING:** Each sample was assessed for the presence of viable bacteria by adding three ml of sterile PBS/LT to each wipe-containing tube whereupon the tube containing the wipe was vortexed at high speed for 1 minute. Samples and various dilutions were plated (100 µl) onto TSA+sheep's blood plates, Mannitol Salt Agar, BBL™ MacConkey II Agar, BBL™ CHROMagar™ MRSA and an Bile Esculin Azide + Vancomycin Agar. The plates were inverted and incubated between 35 - 37° C for 48 hr or as specified by the manufacturer (CHROMagar™ MRSA) and were processed as described by Schmidt and others (1).

## REFERENCES

1. **Attaway, H. H., S. Fairey, L. L. Steed, C. D. Salgado, H. T. Michels, and M. G. Schmidt.** Intrinsic bacterial burden associated with intensive care unit hospital beds: Effects of disinfection on population recovery and mitigation of potential infection risk. *American Journal of Infection Control*. DOI 10.1016/j.ajic.2011.11.019



**TABLE S2**  
**DETERMINATION OF THE INTRINSIC MICROBIAL BURDEN ASSOCIATED WITH SIX HIGH TOUCH**  
**OBJECTS WITH OR WITHOUT COPPER SURFACES WITHIN THREE ICUs**

| Surface                | Composition               | Sample Size | Colony Forming Units/100 cm <sup>2</sup> |                        | % Reduction | p Value |
|------------------------|---------------------------|-------------|------------------------------------------|------------------------|-------------|---------|
|                        |                           |             | Mean                                     | Standard Error of Mean |             |         |
| All Objects Considered | Plastic                   | 511         | 14,813                                   | 1,812                  |             |         |
|                        | Copper Alloy              | 501         | 2,521                                    | 342                    | 83%         |         |
| Bed Rail               | Plastic                   | 455         | 6,471                                    | 1,047                  |             |         |
|                        | Copper Alloy              | 383         | 366                                      | 77                     | 94%         | <0.0001 |
| Call Button            | Plastic                   | 486         | 5,027                                    | 1,158                  |             |         |
|                        | Copper Alloy              | 458         | 954                                      | 199                    | 81%         | <0.0001 |
| Chair                  | Wood                      | 448         | 2,812                                    | 678                    |             |         |
|                        | Copper Alloy              | 441         | 682                                      | 119                    | 76%         | <0.0001 |
| Tray Table             | High Pressure Laminate    | 478         | 673                                      | 158                    |             |         |
|                        | Copper Alloy              | 474         | 224                                      | 64                     | 67%         | <0.0001 |
| Data Input Device      | Plastic                   | 487         | 304                                      | 44                     |             |         |
|                        | Copper Alloy              | 489         | 443                                      | 198                    | -46%        |         |
| IV-Pole                | Stainless Steel or Chrome | 477         | 950                                      | 519                    |             |         |
|                        | Copper Alloy              | 469         | 133                                      | 26                     | 86%         | <0.0001 |

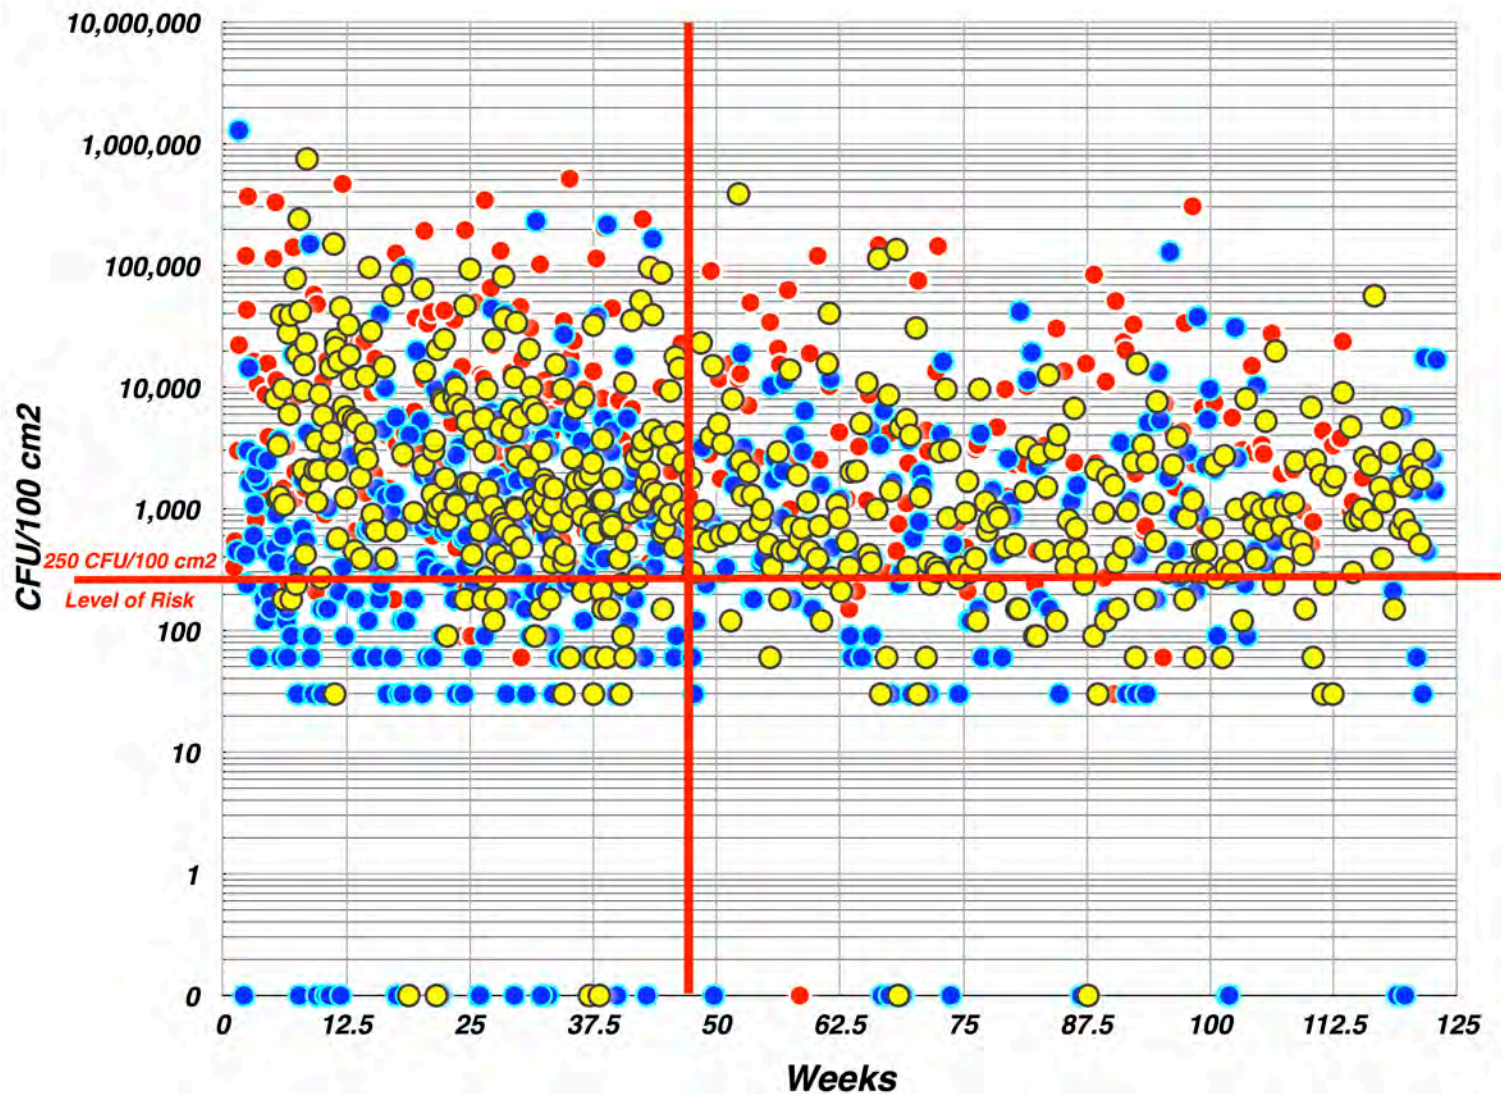

**FIGURE S1. DISTRIBUTION OF THE MICROBIAL BURDEN IN THE BUILT ENVIRONMENT IS SUBJECT TO STOCHASTIC FORCES.** The microbial burden (aerobic colony forming units/100cm<sup>2</sup> (cfu/100cm<sup>2</sup>)) associated with each bed rail is plotted as a function of time (weeks). Values to the right of the vertical red line represent samples collected during the intervention with copper surfaced objects and those to the left represent those collected prior to the intervention.

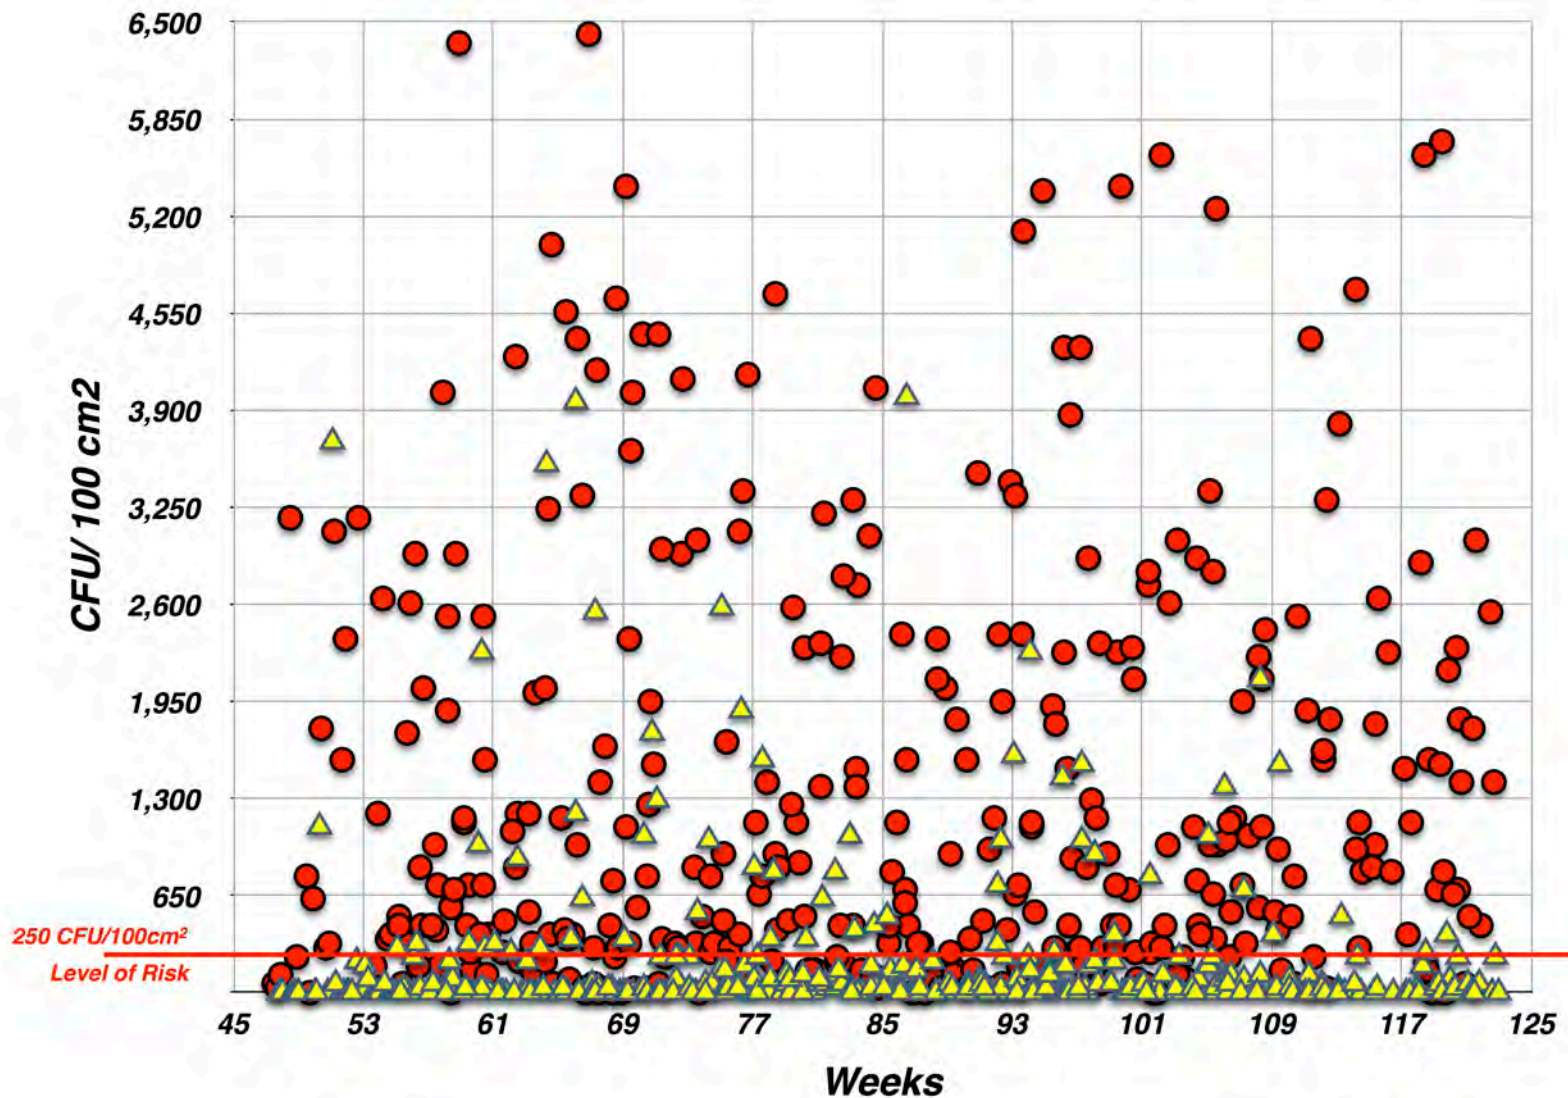

**Figure S2. Copper Surfaces Attenuate the Inherent Variability of the MB Recovered from High Touch Objects in the ICU.** The microbial burden (aerobic colony forming units/100cm<sup>2</sup> (cfu/100cm<sup>2</sup>)) associated with each bed rail is plotted as a function of time (weeks). Red circles represent MB collected from polypropylene bed rails (control) and yellow triangles represent MB collected from copper bed rails.
